# Supplementary material
Source: bioRxiv or medRxiv preprint supplement (https://medrxiv.org/highwire/filestream/82869/field_highwire_adjunct_files/0/2020.05.19.20106906-1.pdf)

## Supplementary Materials to manuscript

Singh S, Moore TJ. *Efficacy and Safety of Hydroxychloroquine and Chloroquine for COVID-19: A Systematic Review. 2020.*

1. Table S1. Search strategy..... Page 2
2. Figure S1 Quality Assessment of Clinical Trials of Chloroquine/Hydroxychloroquine in COVID-19 (n=5).....Page 3
3. Figure S2. Quality Assessment of Controlled Observational Studies of Chloroquine/Hydroxychloroquine in COVID-19 (n=7).....Page 4

**Dable S1. Search Strategy**

| No | Database                                                                     | Search strategy and Terms                                                                                                                                                                                                                                                                                                                                                                                                                                                                                                                                                                                                                    | Dates    | Number of cites |
|----|------------------------------------------------------------------------------|----------------------------------------------------------------------------------------------------------------------------------------------------------------------------------------------------------------------------------------------------------------------------------------------------------------------------------------------------------------------------------------------------------------------------------------------------------------------------------------------------------------------------------------------------------------------------------------------------------------------------------------------|----------|-----------------|
| 1  | PubMed                                                                       | ((("macrolides"[MeSH Terms] OR "macrolides"[All Fields]) OR ("hydroxychloroquine"[MeSH Terms] OR "hydroxychloroquine"[All Fields])) OR ("azithromycin"[MeSH Terms] OR "azithromycin"[All Fields])) OR ("chloroquine"[MeSH Terms] OR "chloroquine"[All Fields]) AND ((covid[All Fields] AND 19[All Fields]) OR (novel[All Fields] AND ("coronavirus"[MeSH Terms] OR "coronavirus"[All Fields])) OR sars[All Fields] OR ("severe acute respiratory syndrome coronavirus 2"[Supplementary Concept] OR "severe acute respiratory syndrome coronavirus 2"[All Fields] OR "sars cov 2"[All Fields])) AND ("2019/11/01"[PDAT] : "2020/12/31"[PDAT]) | April 26 | 124             |
| 2  | Medrxiv                                                                      | (hydroxychloroquine or chloroquine or azithromycin) AND (Covid-19 OR SARS-CoV-2 or coronavirus)"                                                                                                                                                                                                                                                                                                                                                                                                                                                                                                                                             | April 27 | 51              |
| 3  | ClinicalTrials.gov                                                           | Disease or condition: COVID-19 or SARS-Cov-2.<br>Terms: Chloroquine<br>All studies                                                                                                                                                                                                                                                                                                                                                                                                                                                                                                                                                           | April 27 | 51              |
| 4  | ClinicalTrials.gov                                                           | Disease or condition: COVID-19 or SARS-Cov-2.<br>Terms: hydroxychloroquine or Plaquenil<br>All studies                                                                                                                                                                                                                                                                                                                                                                                                                                                                                                                                       | April 27 | 136             |
| 5  | ClinicalTrials.gov                                                           | Disease or condition: COVID-19 or SARS-Cov-2.<br>Terms: Chloroquine or hydroxychloroquine or Plaquenil<br>All studies<br>Studies with results                                                                                                                                                                                                                                                                                                                                                                                                                                                                                                | April 27 | 0               |
| 6  | Total citations from PubMed, medrxiv and clinical trials. gov (#1 + #2 + #5) | NA                                                                                                                                                                                                                                                                                                                                                                                                                                                                                                                                                                                                                                           | April 27 | 175             |

Figure S1. Quality Assessment of Clinical Trials of Chloroquine/Hydroxychloroquine in COVID-19 (n=5)

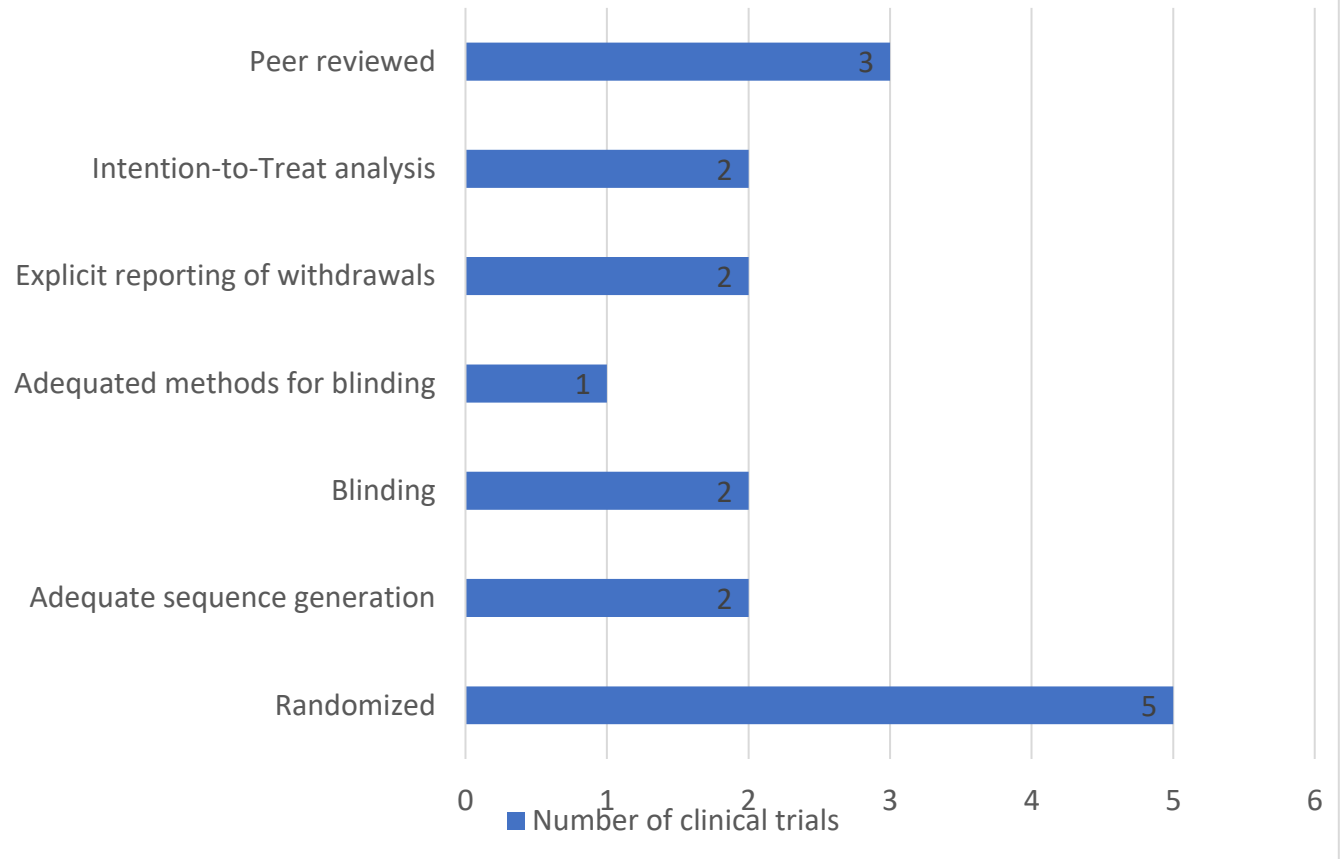

**Figure S2. Quality Assessment of Controlled Observational Studies of Chloroquine/Hydroxychloroquine in COVID-19 (n=7)‡**

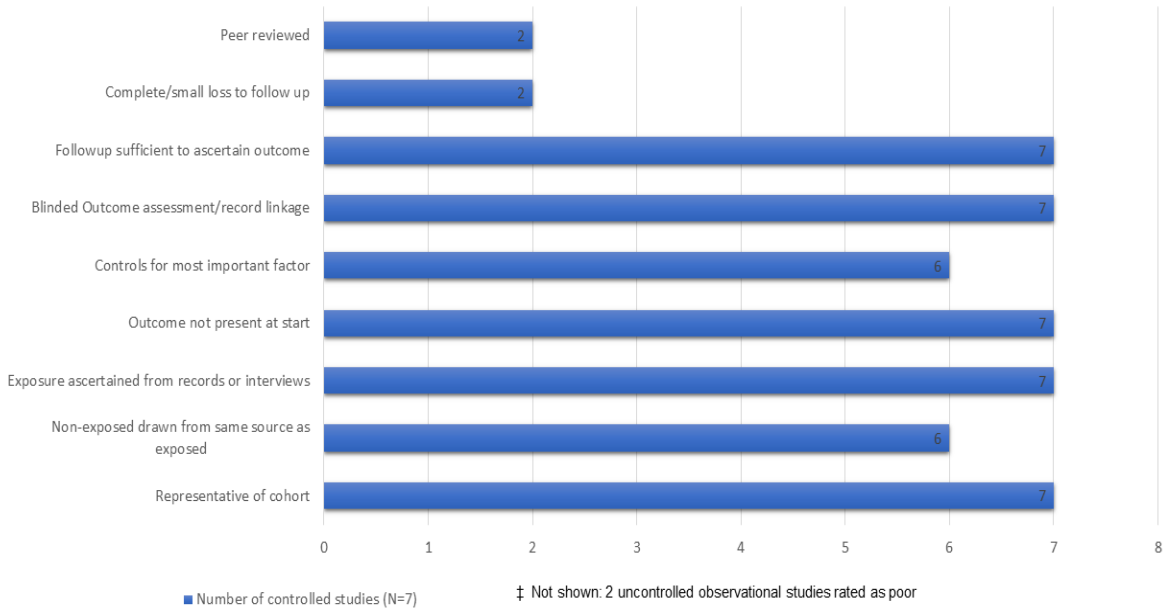

Supplement: Supplementary file [file 2020.05.19.20106906-1.pdf]
